# Supplementary material
Source: publisher figshare collection journal article supplement (https://frontiersin.figshare.com/ndownloader/files/13162592)
Supplement: Supplementary file [file 13162592]

The structured format of 7-day food record is reported below for the first day. The model is repeated for 7 days.

Name and surname: \_\_\_\_\_ CODE: \_\_\_\_\_

DATE: \_\_\_\_\_ DAY OF THE WEEK: \_\_\_\_\_

**DAY 1**

**Before breakfast:**

| <u>Time</u> | <u>Place</u> | <u>DESCRIPTION OF FOODS/DRINKS AND PREPARATION</u> | <u>QUANTITY (as precise as possible)</u> |
|-------------|--------------|----------------------------------------------------|------------------------------------------|
|             |              |                                                    |                                          |
|             |              |                                                    |                                          |
|             |              |                                                    |                                          |
|             |              |                                                    |                                          |
|             |              |                                                    |                                          |

**Breakfast:**

| <u>Time</u> | <u>Place</u> | <u>DESCRIPTION OF FOODS/DRINKS AND PREPARATION</u> | <u>QUANTITY (as precise as possible)</u> |
|-------------|--------------|----------------------------------------------------|------------------------------------------|
|             |              |                                                    |                                          |
|             |              |                                                    |                                          |
|             |              |                                                    |                                          |
|             |              |                                                    |                                          |
|             |              |                                                    |                                          |
|             |              |                                                    |                                          |

Name and surname: \_\_\_\_\_ CODE: \_\_\_\_\_

DATE: \_\_\_\_\_ DAY OF THE WEEK: \_\_\_\_\_

**DAY 1**

During the morning:

| <u>Time</u> | <u>Place</u> | <u>DESCRIPTION OF FOODS/DRINKS AND PREPARATION</u> | <u>QUANTITY (as precise as possible)</u> |
|-------------|--------------|----------------------------------------------------|------------------------------------------|
|             |              |                                                    |                                          |
|             |              |                                                    |                                          |
|             |              |                                                    |                                          |
|             |              |                                                    |                                          |

Lunch:

| <u>Time</u> | <u>Place</u> | <u>DESCRIPTION OF FOODS/DRINKS AND PREPARATION</u> | <u>QUANTITY (as precise as possible)</u> |
|-------------|--------------|----------------------------------------------------|------------------------------------------|
|             |              |                                                    |                                          |
|             |              |                                                    |                                          |
|             |              |                                                    |                                          |
|             |              |                                                    |                                          |
|             |              |                                                    |                                          |
|             |              |                                                    |                                          |
|             |              |                                                    |                                          |
|             |              |                                                    |                                          |

Name and surname: \_\_\_\_\_ CODE: \_\_\_\_\_

DATE: \_\_\_\_\_ DAY OF THE WEEK: \_\_\_\_\_

**DAY 1**

**During the afternoon:**

| <u>Time</u> | <u>Place</u> | <u>DESCRIPTION OF FOODS/DRINKS AND PREPARATION</u> | <u>QUANTITY (as precise as possible)</u> |
|-------------|--------------|----------------------------------------------------|------------------------------------------|
|             |              |                                                    |                                          |
|             |              |                                                    |                                          |
|             |              |                                                    |                                          |
|             |              |                                                    |                                          |

**Dinner:**

| <u>Time</u> | <u>Place</u> | <u>DESCRIPTION OF FOODS/DRINKS AND PREPARATION</u> | <u>QUANTITY (as precise as possible)</u> |
|-------------|--------------|----------------------------------------------------|------------------------------------------|
|             |              |                                                    |                                          |
|             |              |                                                    |                                          |
|             |              |                                                    |                                          |
|             |              |                                                    |                                          |
|             |              |                                                    |                                          |
|             |              |                                                    |                                          |
|             |              |                                                    |                                          |
|             |              |                                                    |                                          |

Name and surname: \_\_\_\_\_ CODE: \_\_\_\_\_

DATE: \_\_\_\_\_ DAY OF THE WEEK: \_\_\_\_\_

**DAY 1**

After dinner:

| <u>Time</u> | <u>Place</u> | <u>DESCRIPTION OF FOODS/DRINKS AND PREPARATION</u> | <u>QUANTITY (as precise as possible)</u> |
|-------------|--------------|----------------------------------------------------|------------------------------------------|
|             |              |                                                    |                                          |
|             |              |                                                    |                                          |
|             |              |                                                    |                                          |
|             |              |                                                    |                                          |

During the night:

| <u>Time</u> | <u>Place</u> | <u>DESCRIPTION OF FOODS/DRINKS AND PREPARATION</u> | <u>QUANTITY (as precise as possible)</u> |
|-------------|--------------|----------------------------------------------------|------------------------------------------|
|             |              |                                                    |                                          |
|             |              |                                                    |                                          |
|             |              |                                                    |                                          |

Note (es: recipes)

---

---

---

---

---

---
